# Supplementary material for: Integrated Small RNA Sequencing, Transcriptome, and GWAS Data Reveal miRNA Regulation in Response to Milk Protein Traits in Chinese Holstein Cattle
Source: Research Square preprint supplement (doi:10.21203/rs.3.rs-142254/v1), 2021-01-13
Supplement: Supplementary file 1 [file 2b71c9035e254d527230a062.xlsx]

## Sheet: HP vs LP
ID	baseMean	log2FoldChange	pvalue
bta-let-7a-3p|bta-let-7a-1	135.296	0.904241	0.0350876
bta-let-7a-3p|bta-let-7a-3	134.977	0.899003	0.0361932
bta-let-7f|bta-let-7f-1	14657.8	0.826898	0.0166306
bta-let-7f|bta-let-7f-2	15679.1	0.828243	0.0172199
bta-miR-143|bta-mir-143	123682	-0.839667	0.000871267
bta-miR-144|bta-mir-144	45.4117	-1.84084	0.00578818
bta-miR-146a|bta-mir-146a	552.081	-1.34885	0.00016594
bta-miR-146b|bta-mir-146b	324.757	-1.61128	4.15071e-07
bta-miR-150|bta-mir-150	1338.66	1.2726	0.0401097
bta-miR-152|bta-mir-152	543.325	-0.821989	0.0300985
bta-miR-16a|bta-mir-16a	2902.25	-0.940278	0.0422166
bta-miR-185|bta-mir-185	18.4413	-1.18147	0.0292012
bta-miR-204|bta-mir-204	110.278	1.04045	0.0119998
bta-miR-24-3p|bta-mir-24-1	896.893	-1.16476	0.00442746
bta-miR-24-3p|bta-mir-24-2	883.658	-1.17566	0.004262
bta-miR-2478|bta-mir-2478	3519.55	0.939122	0.000771221
bta-miR-2904|bta-mir-2904-1	81.7834	-0.839966	0.0203189
bta-miR-2904|bta-mir-2904-2	81.7834	-0.839966	0.0203189
bta-miR-2904|bta-mir-2904-3	81.7834	-0.839966	0.0203189
bta-miR-320a|bta-mir-320a-1	39.1278	0.865888	0.029631
bta-miR-320a|bta-mir-320a-2	39.1278	0.865888	0.029631
bta-miR-326|bta-mir-326	84.4275	0.977397	0.00356829
bta-miR-340|bta-mir-340	45.6081	1.0249	0.0247242
bta-miR-34a|bta-mir-34a	129.026	-1.36419	5.88774e-06
bta-miR-374a|bta-mir-374a	364.612	-0.939341	0.00527331
bta-miR-379|bta-mir-379	49.1442	-3.08749	3.98581e-09
bta-miR-382|bta-mir-382	7.82829	-1.47988	0.0466055
bta-miR-411c-3p|bta-mir-411c	8.91605	-1.83735	0.0172525
bta-miR-423-3p|bta-mir-423	1577.14	0.977768	0.00654383
bta-miR-423-5p|bta-mir-423	1335.45	1.45316	2.239e-06
bta-miR-425-3p|bta-mir-425	73.7499	-1.09081	0.00616435
bta-miR-451|bta-mir-451	621.274	-1.30012	0.00299617
bta-miR-655|bta-mir-655	29.6257	-0.875585	0.0434605
bta-miR-92b|bta-mir-92b	91.3642	0.870665	0.00580051

## Sheet: HD vs LD
ID	baseMean	log2FoldChange	pvalue
bta-miR-1|bta-mir-1-1	6.47588	-2.94354	0.00944944
bta-miR-1|bta-mir-1-2	6.47588	-2.94354	0.00944944
bta-miR-100|bta-mir-100	8273.6	-1.42347	0.000260431
bta-miR-10a|bta-mir-10a	6181.92	-1.10471	0.00245145
bta-miR-10b|bta-mir-10b	69735	-1.43401	1.60216e-05
bta-miR-1185|bta-mir-1185	30.3676	0.813684	0.0485083
bta-miR-1271|bta-mir-1271	38.2493	-1.3574	0.00174236
bta-miR-1296|bta-mir-1296	39.3285	0.811986	0.0443472
bta-miR-132|bta-mir-132	21.4687	1.33997	0.0345844
bta-miR-1388-5p|bta-mir-1388	97.5917	-1.49978	0.00132065
bta-miR-141|bta-mir-141	12372.9	-1.50523	6.97359e-05
bta-miR-143|bta-mir-143	183121	-1.15758	0.00623167
bta-miR-144|bta-mir-144	37.9345	-3.43312	0.000694818
bta-miR-146a|bta-mir-146a	2438.27	-1.97494	2.57553e-06
bta-miR-146b|bta-mir-146b	3277.77	-1.83207	3.36666e-08
bta-miR-147|bta-mir-147	136.584	1.30446	0.000128231
bta-miR-149-5p|bta-mir-149	69.7295	0.929783	0.0206149
bta-miR-150|bta-mir-150	969.448	0.943908	0.00234673
bta-miR-152|bta-mir-152	611.063	-1.28347	0.000544339
bta-miR-16a|bta-mir-16a	3825.07	-1.05437	0.001554
bta-miR-185|bta-mir-185	41.3477	-1.78623	3.42079e-06
bta-miR-192|bta-mir-192	1985.52	-1.24911	3.52288e-05
bta-miR-195|bta-mir-195	2797.83	-0.995607	0.00562865
bta-miR-196a|bta-mir-196a-1	122.697	-1.3825	4.89464e-06
bta-miR-196a|bta-mir-196a-2	439.593	-1.41366	2.20581e-06
bta-miR-196b|bta-mir-196b	314.344	-0.834871	0.0171677
bta-miR-199a-5p|bta-mir-199a-1	1186.07	1.66172	9.98907e-06
bta-miR-199a-5p|bta-mir-199a-2	1186.07	1.66172	9.98907e-06
bta-miR-20b|bta-mir-20b	34.7334	1.09446	0.0261806
bta-miR-24-3p|bta-mir-24-1	1571.5	-1.48863	0.000107723
bta-miR-24-3p|bta-mir-24-2	1551.59	-1.50186	9.50792e-05
bta-miR-2411-3p|bta-mir-2411	8.97205	1.87248	0.0236326
bta-miR-2478|bta-mir-2478	710.275	1.55658	9.53778e-05
bta-miR-26a|bta-mir-26a-1	67394	-0.916105	0.0010528
bta-miR-26a|bta-mir-26a-2	67424.2	-0.915478	0.00106148
bta-miR-26b|bta-mir-26b	11423.3	-0.9548	0.000388011
bta-miR-27b|bta-mir-27b	43909.5	-1.02414	0.00134472
bta-miR-2887|bta-mir-2887-1	104.11	2.07863	0.000148736
bta-miR-2887|bta-mir-2887-2	104.11	2.07863	0.000148736
bta-miR-2904|bta-mir-2904-1	28.1179	1.31239	0.0470042
bta-miR-2904|bta-mir-2904-2	28.1179	1.31239	0.0470042
bta-miR-2904|bta-mir-2904-3	28.1179	1.31239	0.0470042
bta-miR-296-3p|bta-mir-296	87.951	0.804188	0.0236827
bta-miR-30a-5p|bta-mir-30a	77091	-1.65083	0.000180108
bta-miR-326|bta-mir-326	62.1232	0.816076	0.0176905
bta-miR-331-3p|bta-mir-331	89.9757	1.75601	2.6865e-07
bta-miR-374a|bta-mir-374a	349.666	-1.10748	0.000376711
bta-miR-379|bta-mir-379	368.548	-3.08076	9.01829e-09
bta-miR-409a|bta-mir-409a	26.7181	-0.997566	0.0271932
bta-miR-429|bta-mir-429	445.645	1.04757	0.000236188
bta-miR-484|bta-mir-484	246.09	0.852759	0.0020601
bta-miR-486|bta-mir-486	1524.4	-2.85382	2.02146e-05
bta-miR-494|bta-mir-494	51.6251	1.12025	0.00890358
bta-miR-495|bta-mir-495	18.6828	1.06597	0.0482574
bta-miR-505|bta-mir-505	39.3289	0.991775	0.0103515
bta-miR-6524|bta-mir-6524	151.296	-1.17693	0.00367424
bta-miR-665|bta-mir-665	19.1693	1.1326	0.0421999
bta-miR-885|bta-mir-885	8.0194	2.14078	0.0355086
bta-miR-99a-5p|bta-mir-99a	6961.39	-1.56372	3.10712e-06
bta-miR-99b|bta-mir-99b	2751.8	-1.09327	0.000164857
